# Supplementary material for: When crown ethers finally click: novel, click-assembled, fluorescent enantiopure pyridino-crown ether-based chemosensors–and anN-2-aryl-1,2,3-triazole containing one
Source: Royal Society of Chemistry journal article supplement (doi:10.1039/d1nj04173h), 2021-01-01
Supplement: d1nj04173h1.pdf [file d1nj04173h1.pdf]

## Electronic Supplementary Information

### **When crown ethers finally click: novel, click-assembled, fluorescent enantiopure pyridino-crown ether-based chemosensors – and an *N*-2-aryl-1,2,3-triazole containing one**

Balázs Szemenyei,<sup>a</sup> Mira Malmosi,<sup>a</sup> Dávid Pál,<sup>a</sup> Péter Baranyai,<sup>b</sup> László Drahos,<sup>c</sup>  
Ildikó Móczár\*<sup>a</sup> and Péter Huszthy\*<sup>a</sup>

<sup>a</sup>Department of Organic Chemistry and Technology, Budapest University of Technology and Economics, PO Box 91, H-1521 Budapest, Hungary

<sup>b</sup>Wigner Research Centre for Physics, PO Box 49, H-1525 Budapest, Hungary

<sup>c</sup>Institute of Organic Chemistry, Research Centre for Natural Sciences, PO Box 286, H-1519 Budapest, Hungary

\*Corresponding authors. E-mail: moczar.ildiko@vbk.bme.hu, huszthy.peter@vbk.bme.hu

### **Table of contents**

|                                                                                                                                                             |     |
|-------------------------------------------------------------------------------------------------------------------------------------------------------------|-----|
| <sup>1</sup> H and <sup>13</sup> C NMR spectra of ( <i>S,S</i> )- <b>1</b> –( <i>S,S</i> )- <b>4</b> and ( <i>S,S</i> )- <b>6</b> –( <i>S,S</i> )- <b>8</b> | S2  |
| Evaluation of 2D NMR spectra of ( <i>S,S</i> )- <b>1</b> –( <i>S,S</i> )- <b>3</b>                                                                          | S17 |

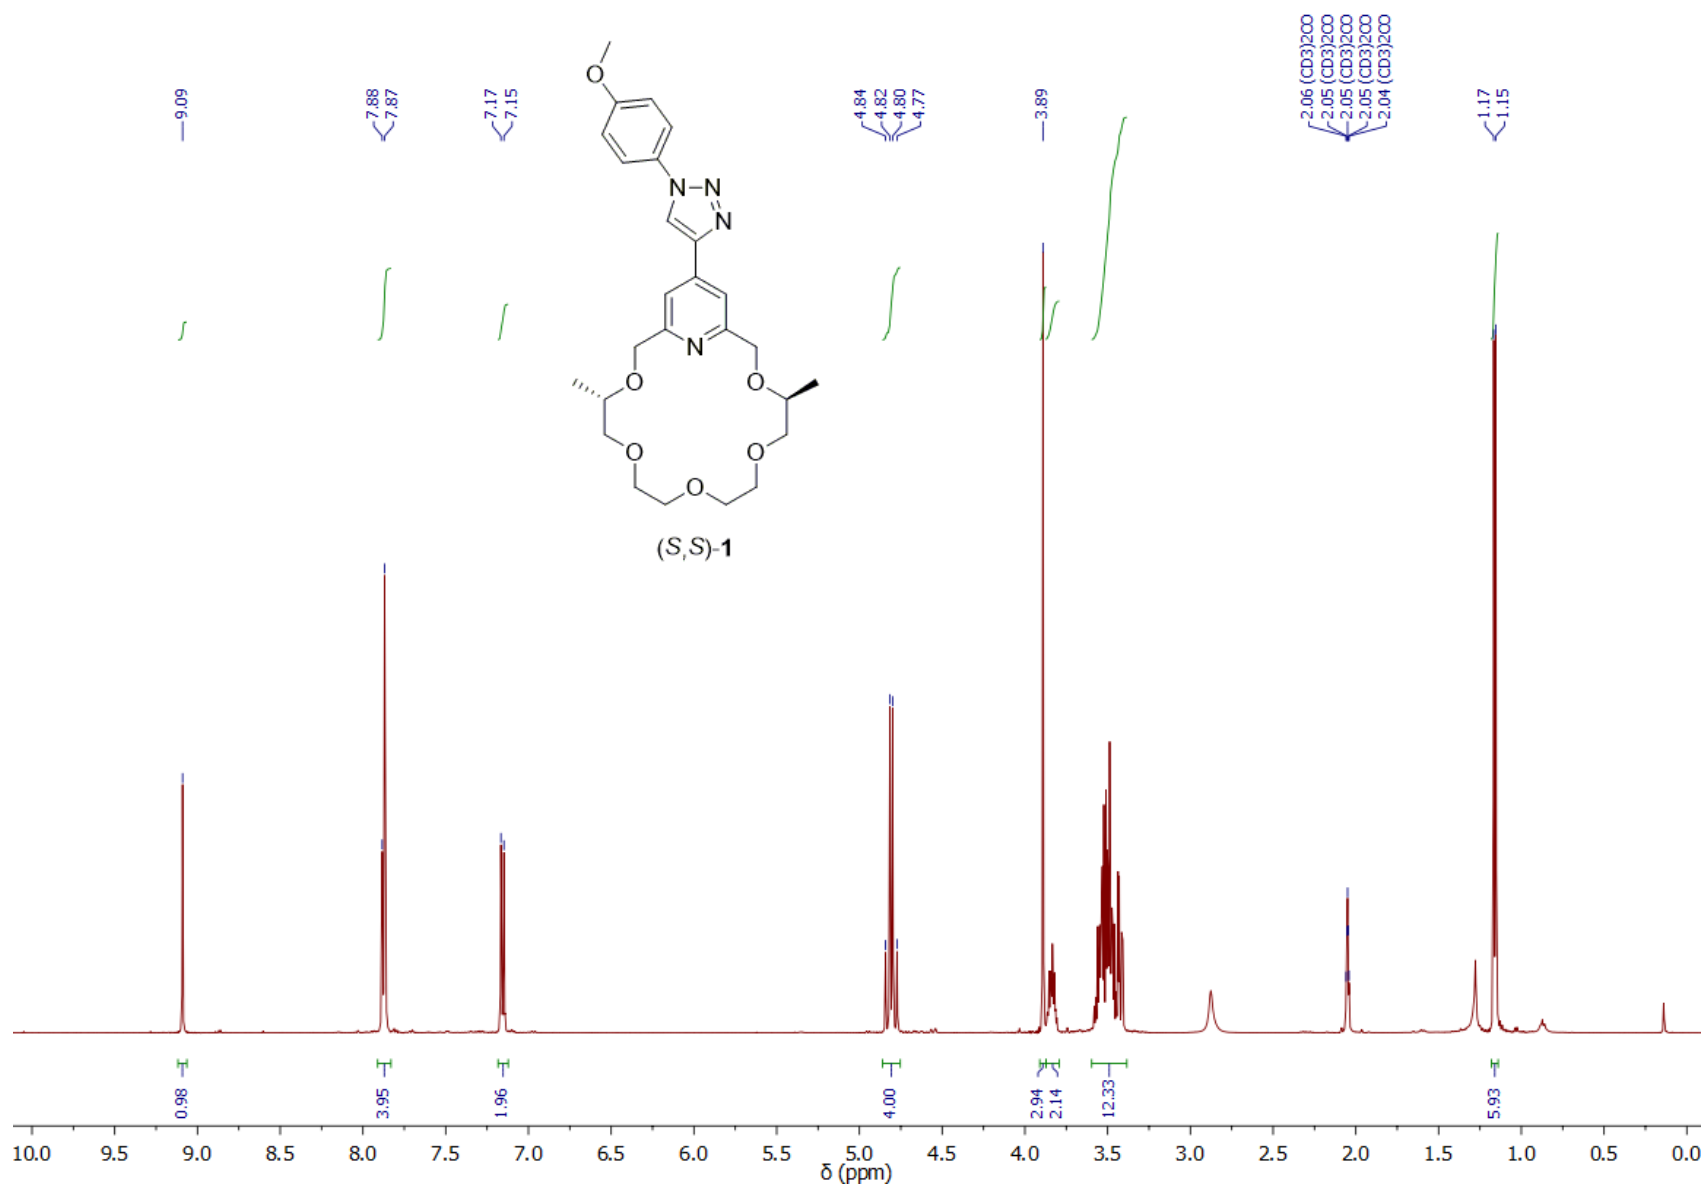

Figure S1. <sup>1</sup>H NMR spectrum of (S,S)-1 (acetone-*d*<sub>6</sub>, 500 MHz)

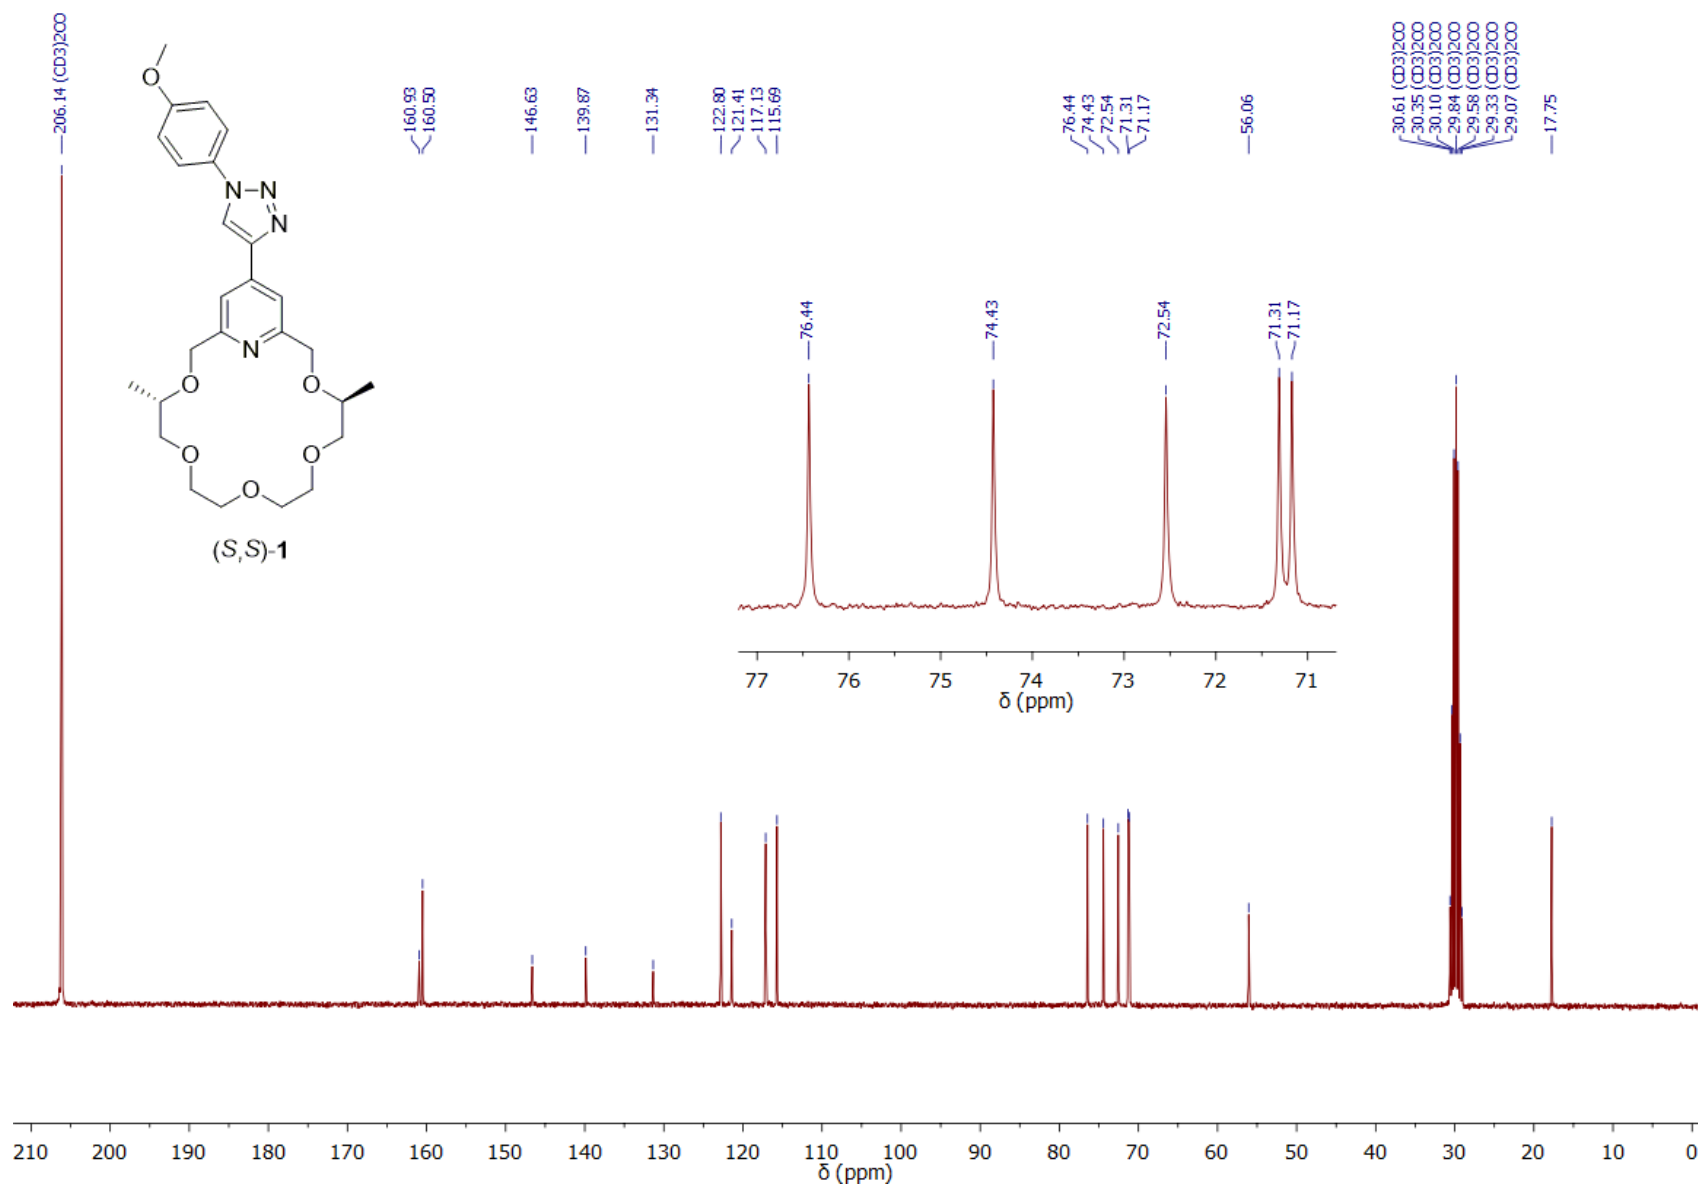

Figure S2.  $^{13}\text{C}$  NMR spectrum of (S,S)-1 (acetone- $d_6$ , 75.5 MHz)

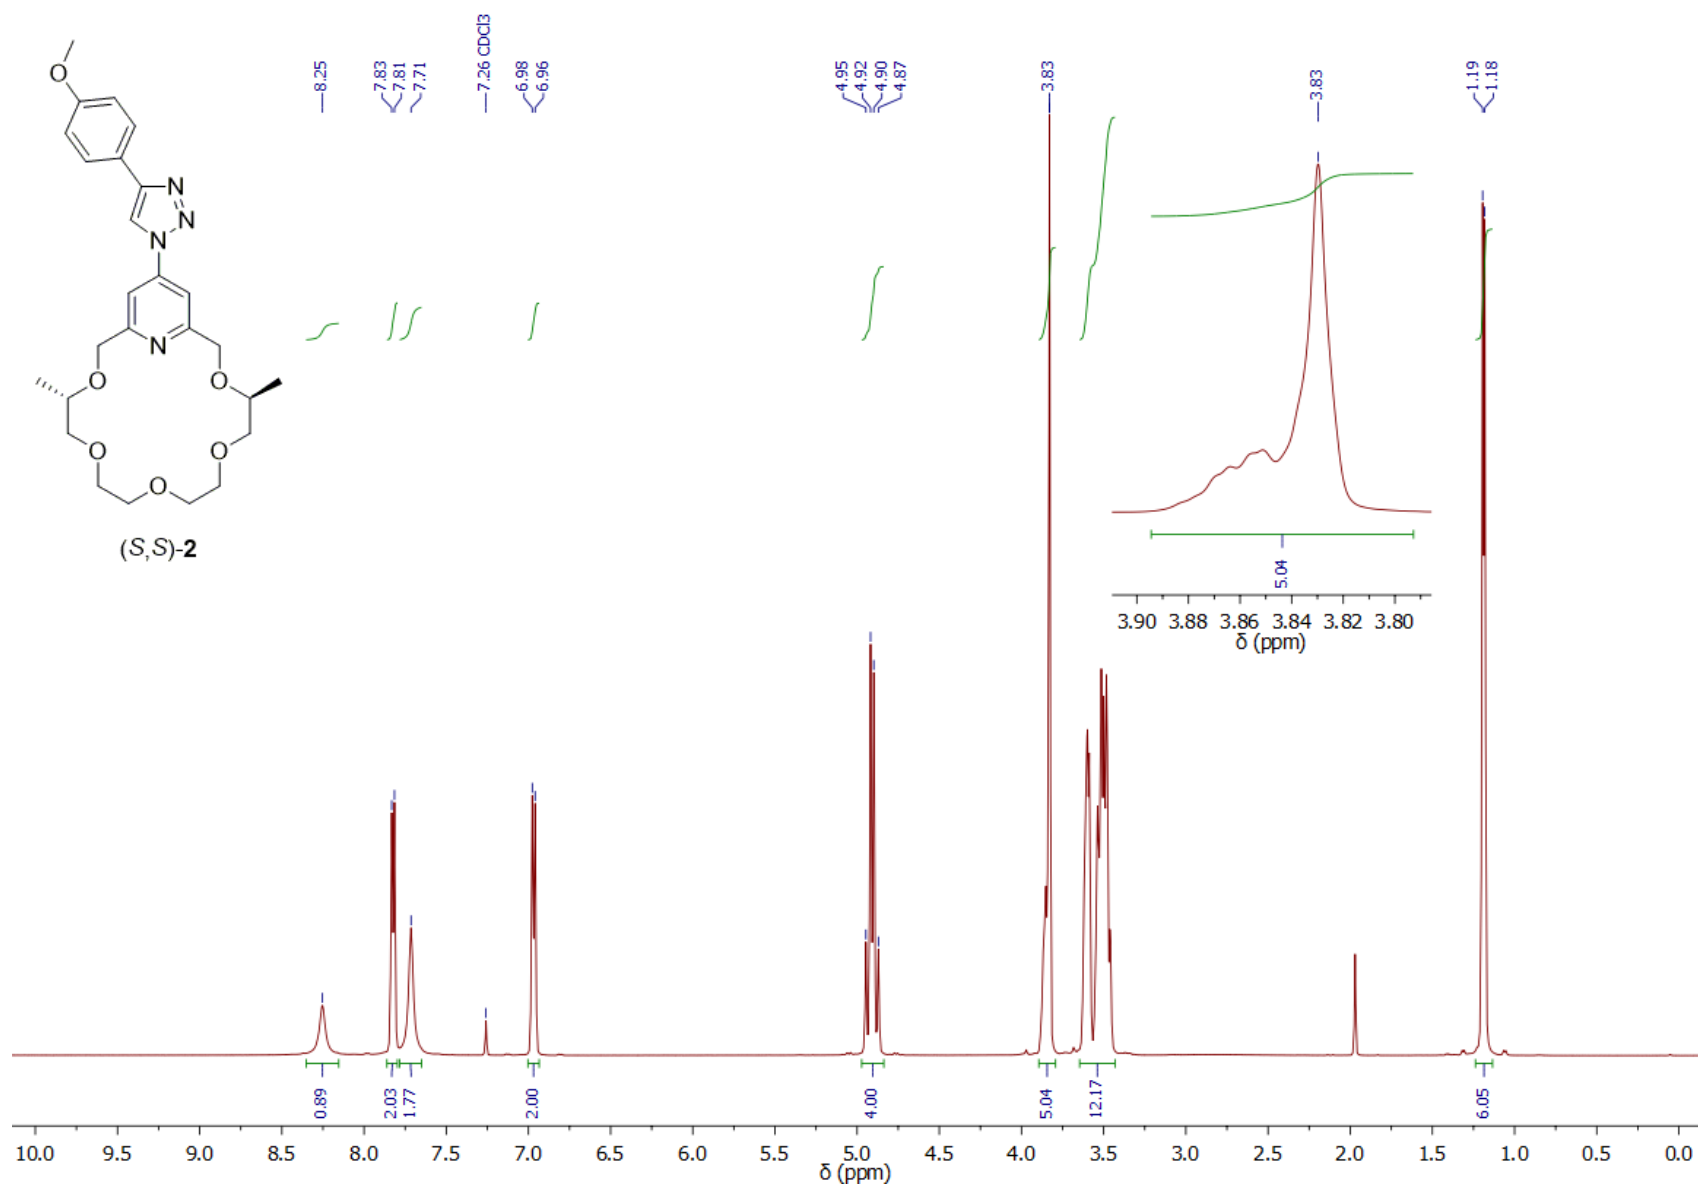

Figure S3.  $^1\text{H}$  NMR spectrum of (S,S)-2 (CDCl<sub>3</sub>, 500 MHz)

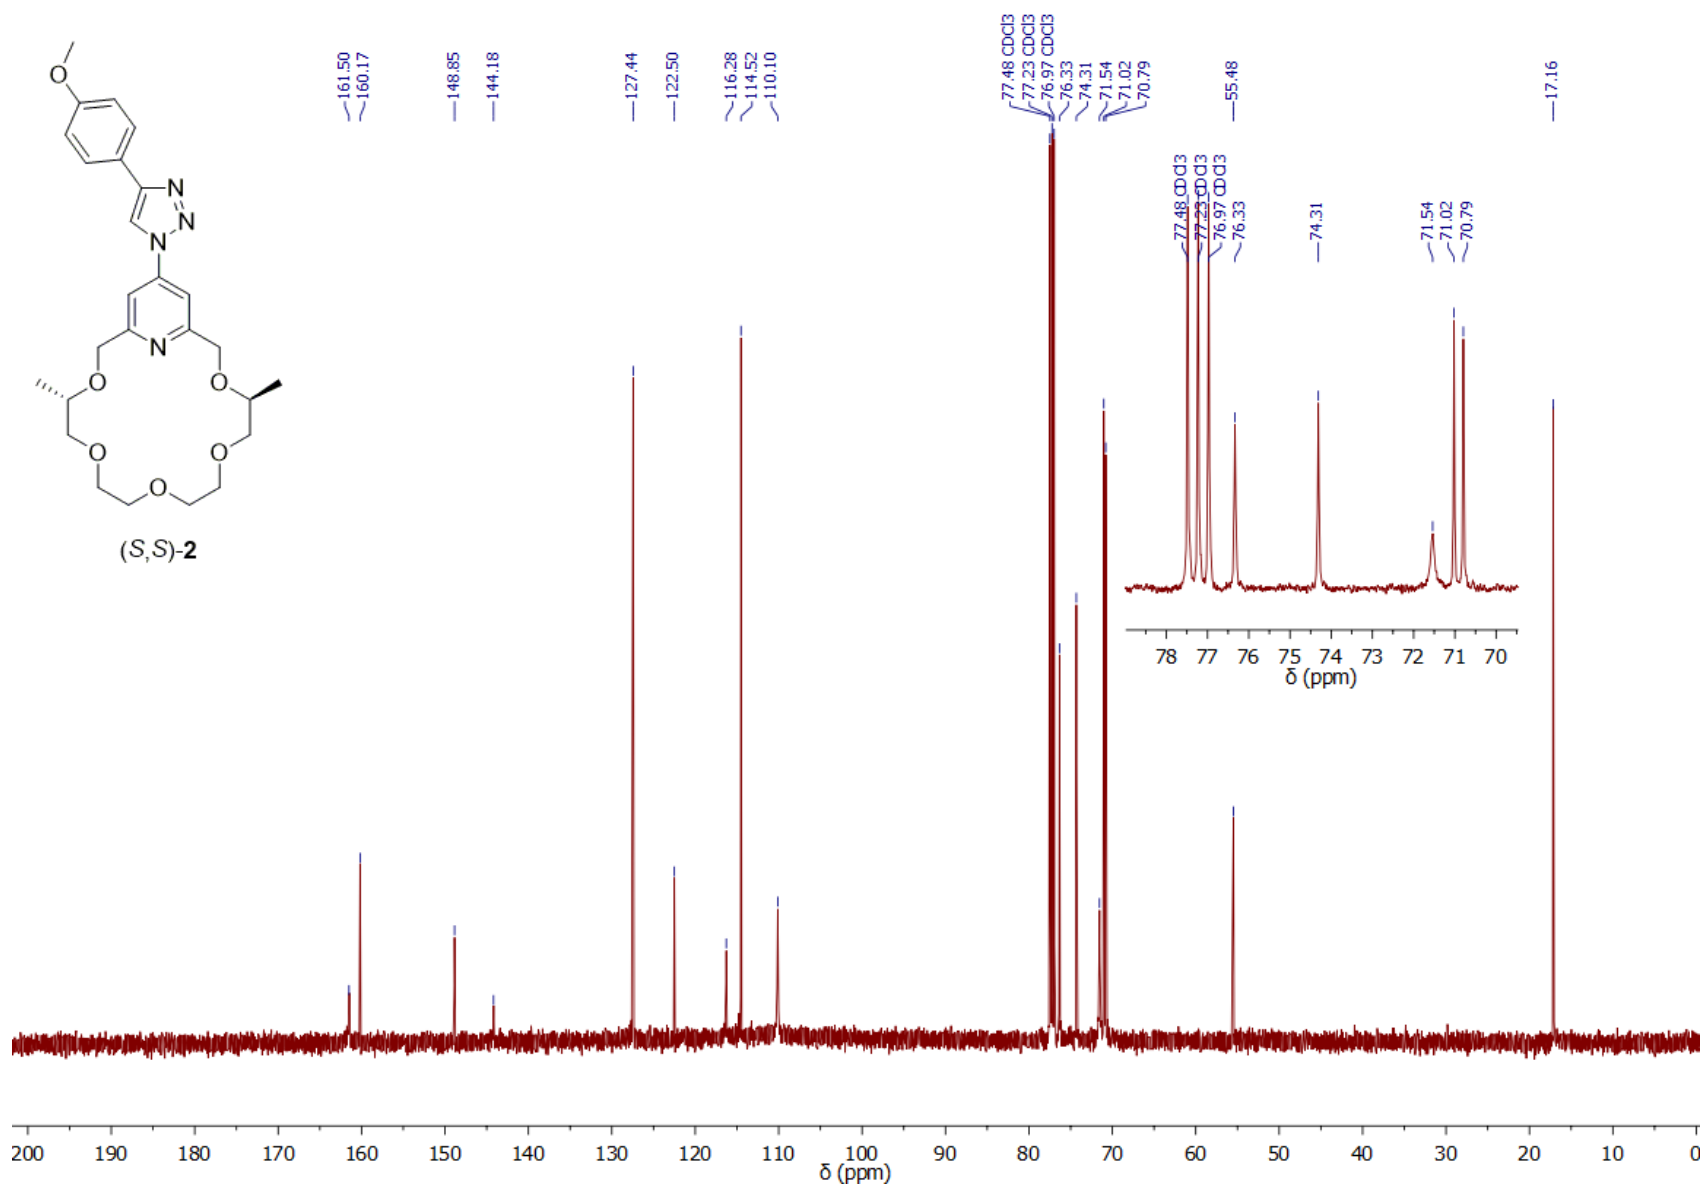

Figure S4. <sup>13</sup>C NMR spectrum of (S,S)-2 (CDCl<sub>3</sub>, 125 MHz)

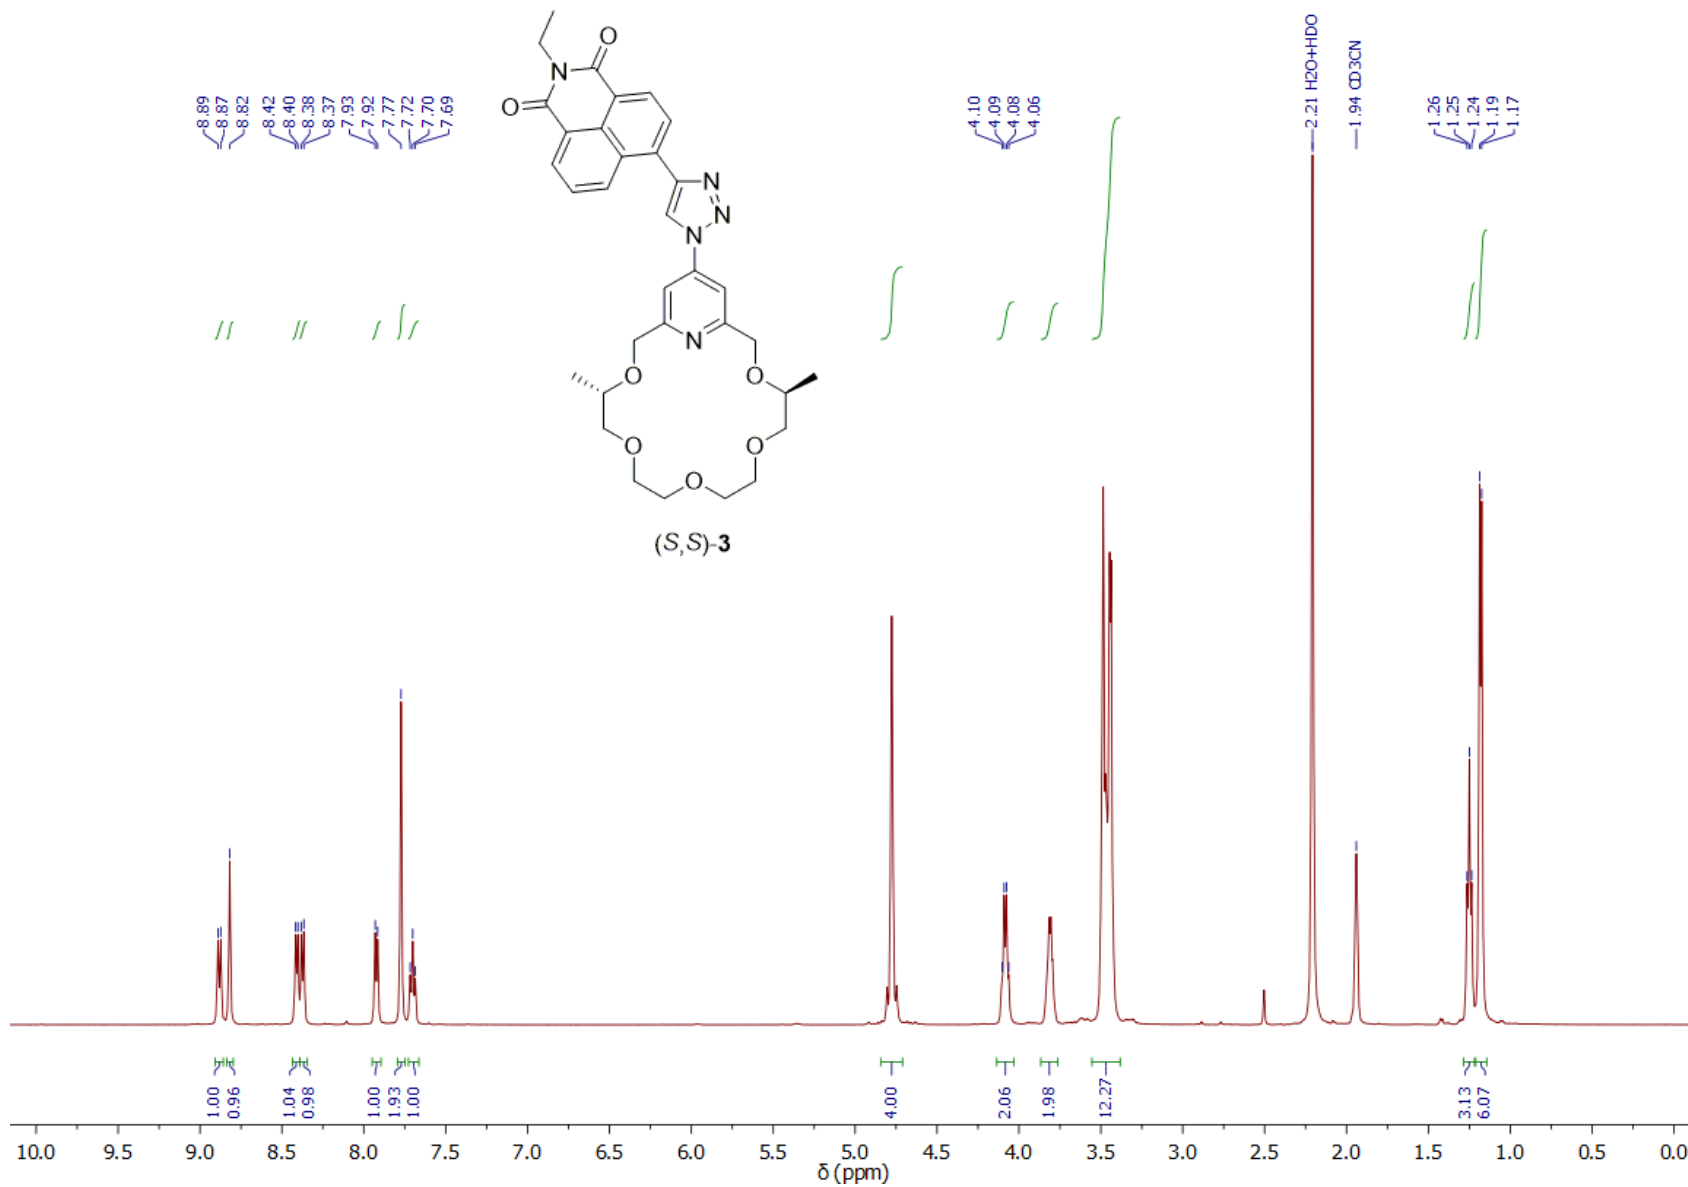

Figure S5A. <sup>1</sup>H NMR spectrum of (S,S)-3 (CD<sub>3</sub>CN, 500 MHz)

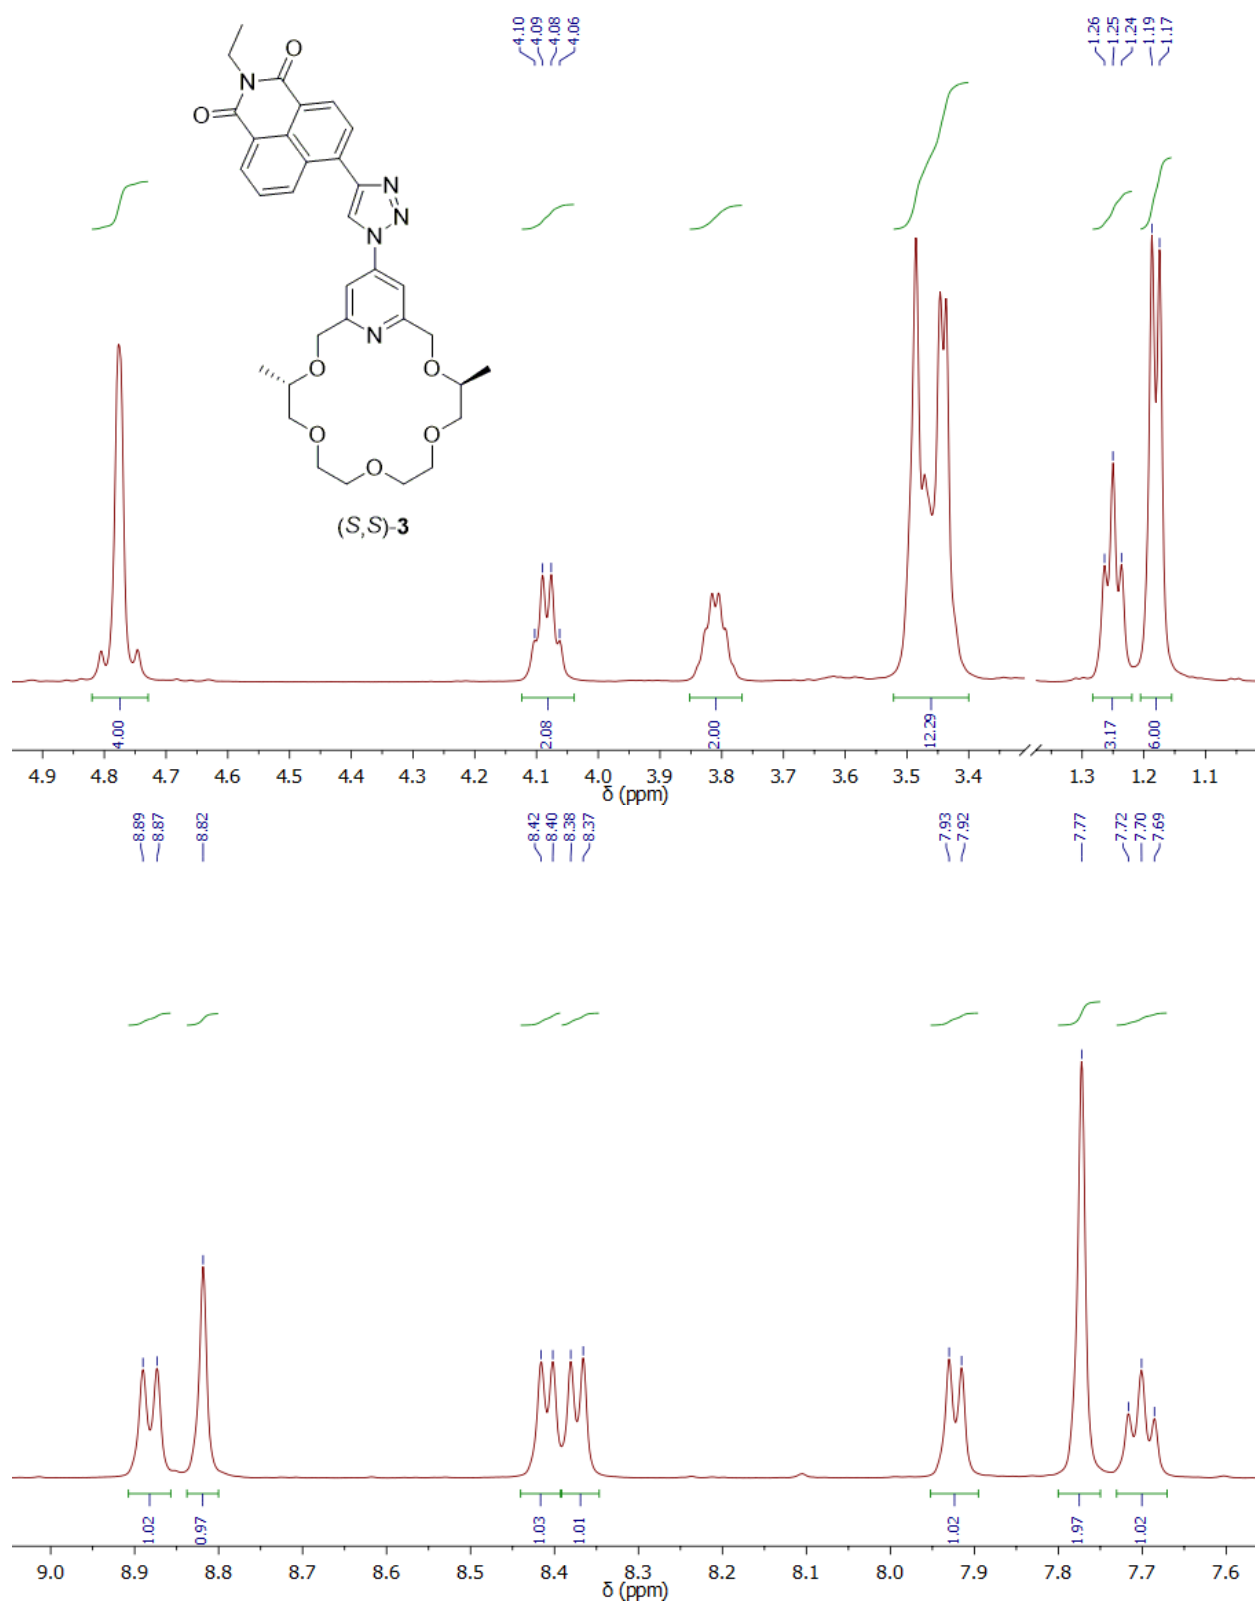

**Figure S5B.** Parts of the <sup>1</sup>H NMR spectrum of (S,S)-3 (CD<sub>3</sub>CN, 500 MHz)

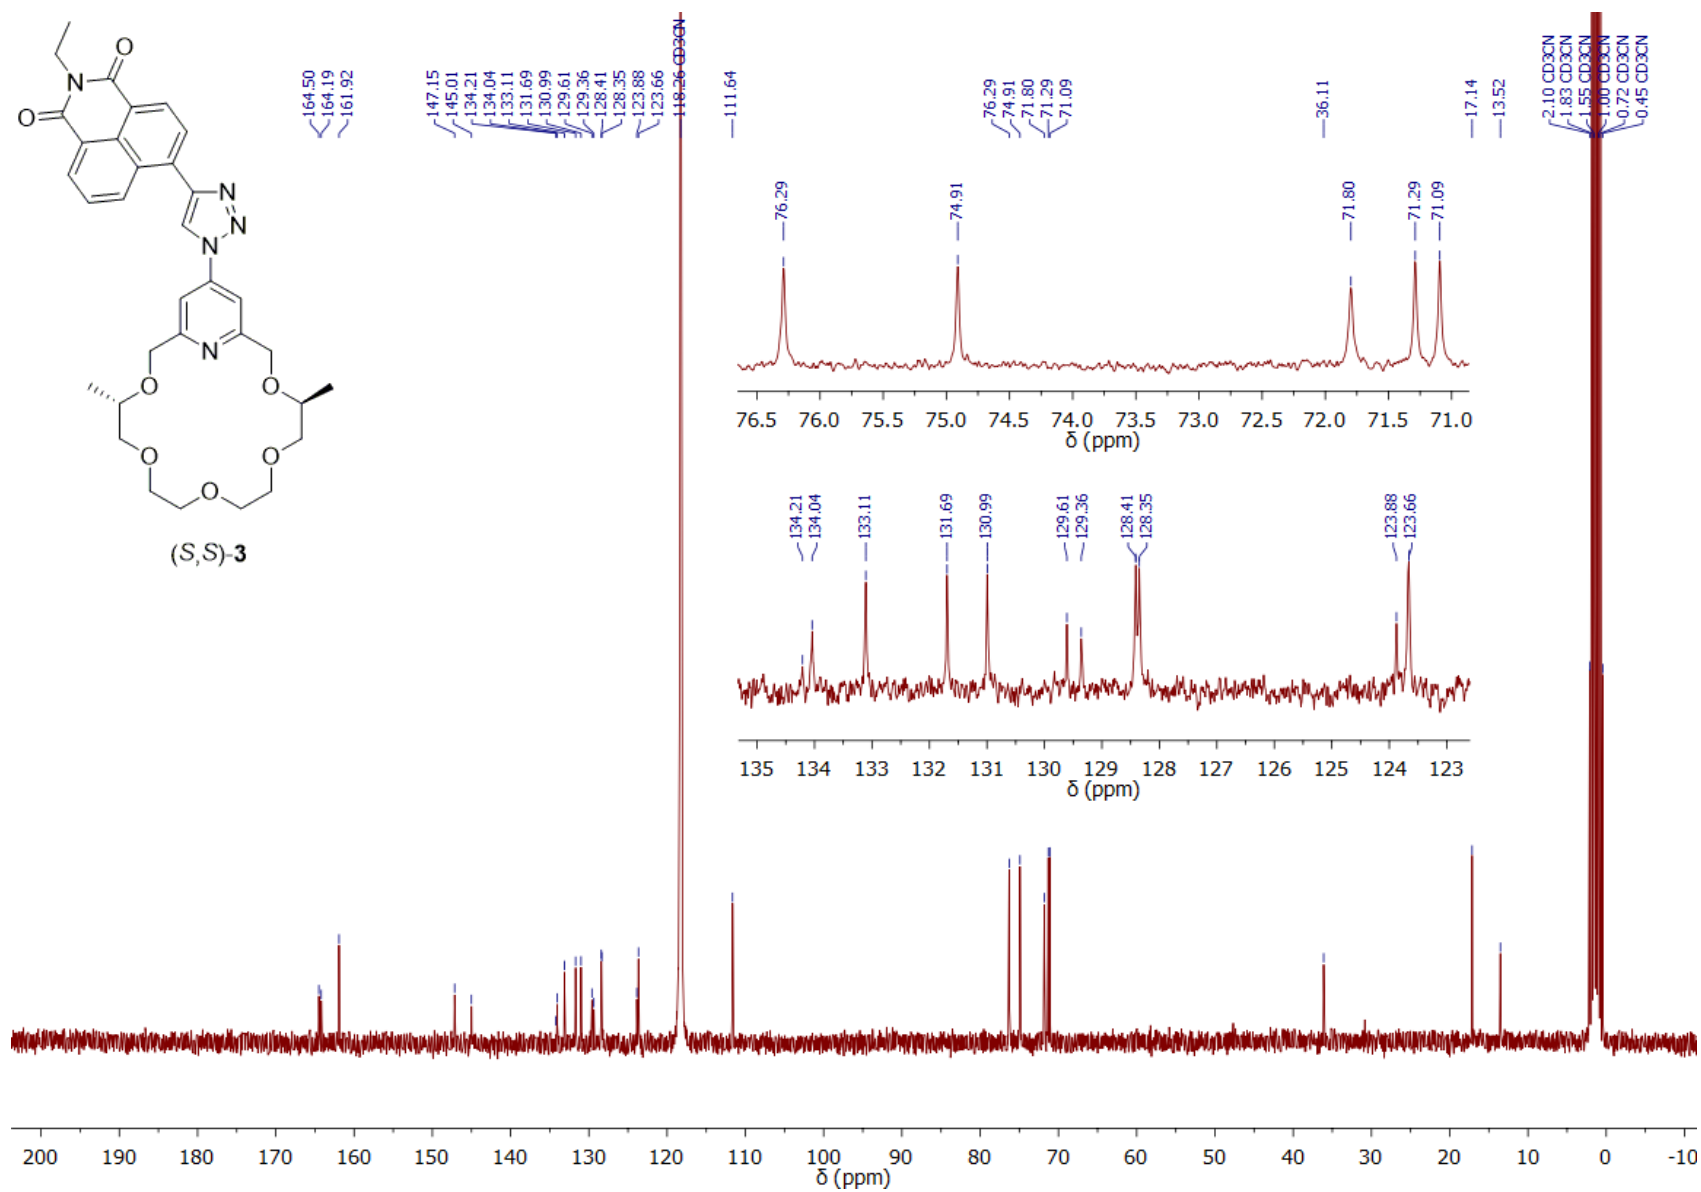

Figure S6.  $^{13}\text{C}$  NMR spectrum of **(S,S)-3** (CD<sub>3</sub>CN, 125 MHz)



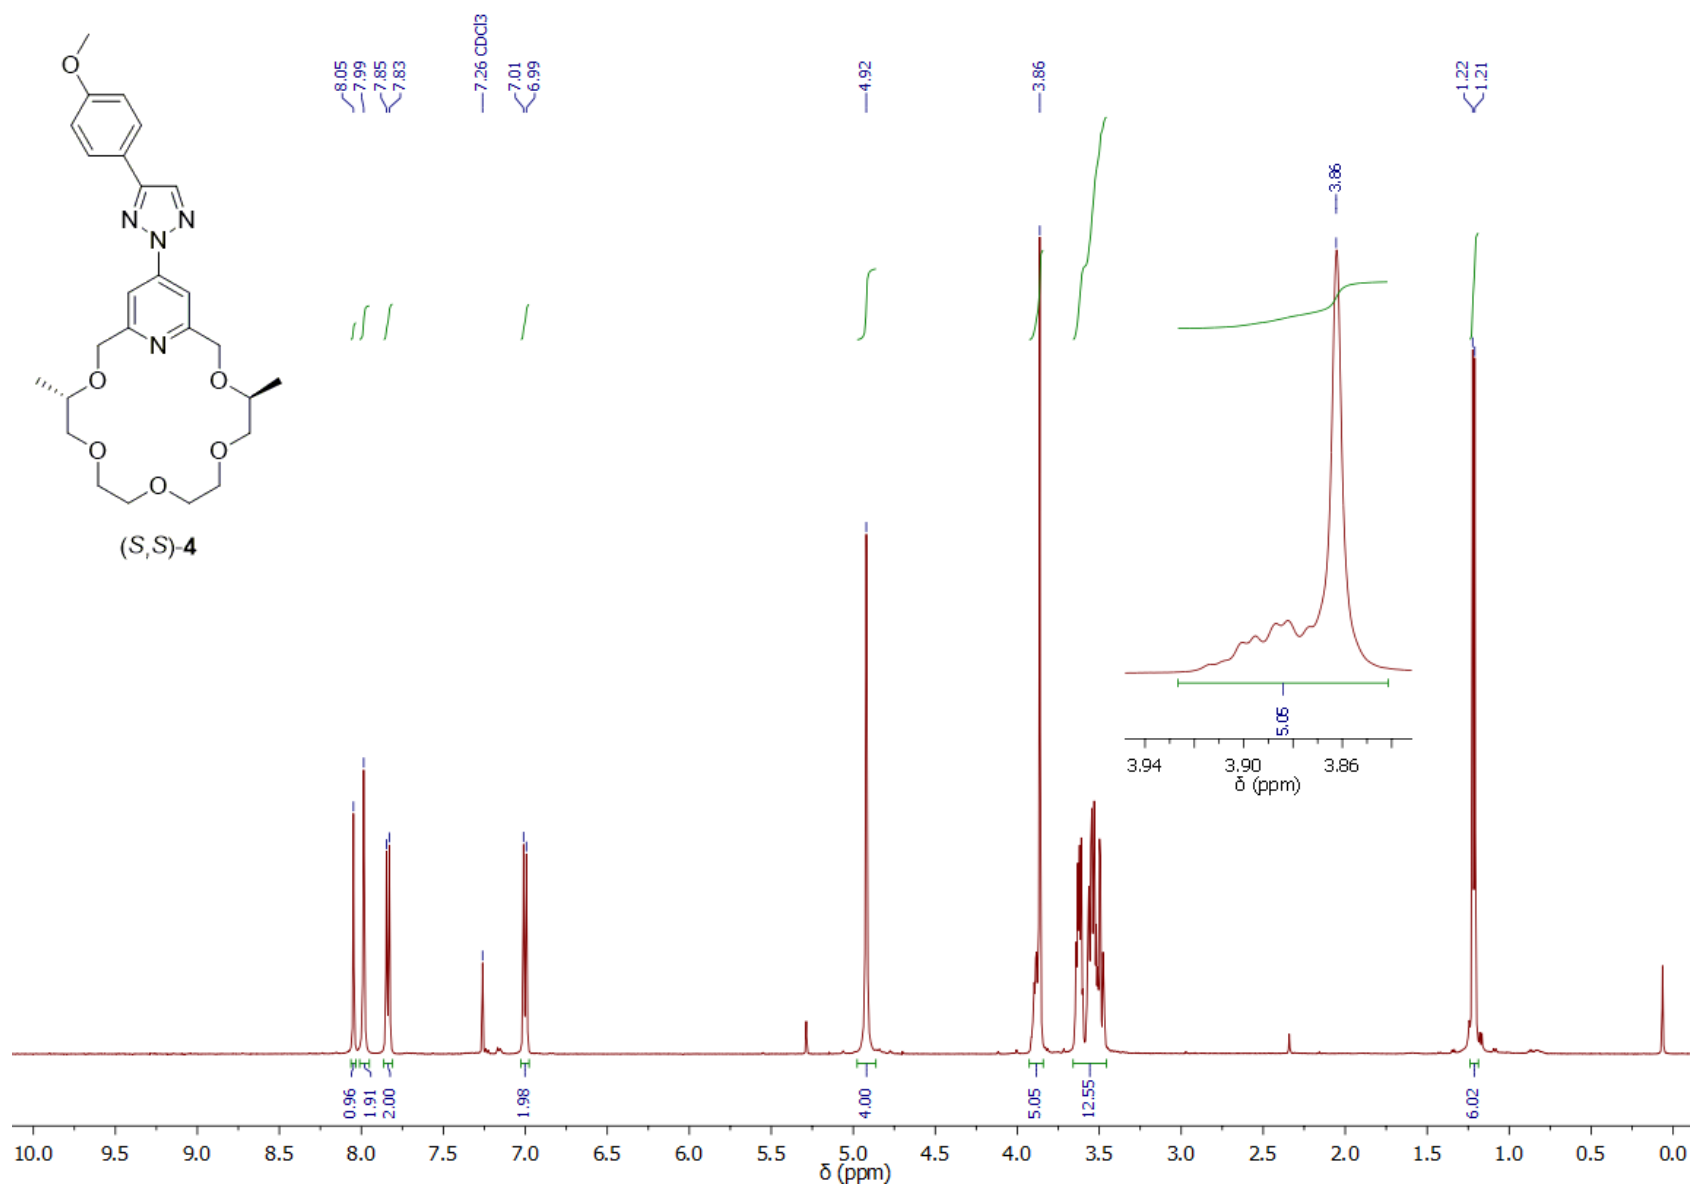

Figure S7.  $^1\text{H}$  NMR spectrum of (S,S)-4 (CDCl<sub>3</sub>, 500 MHz)

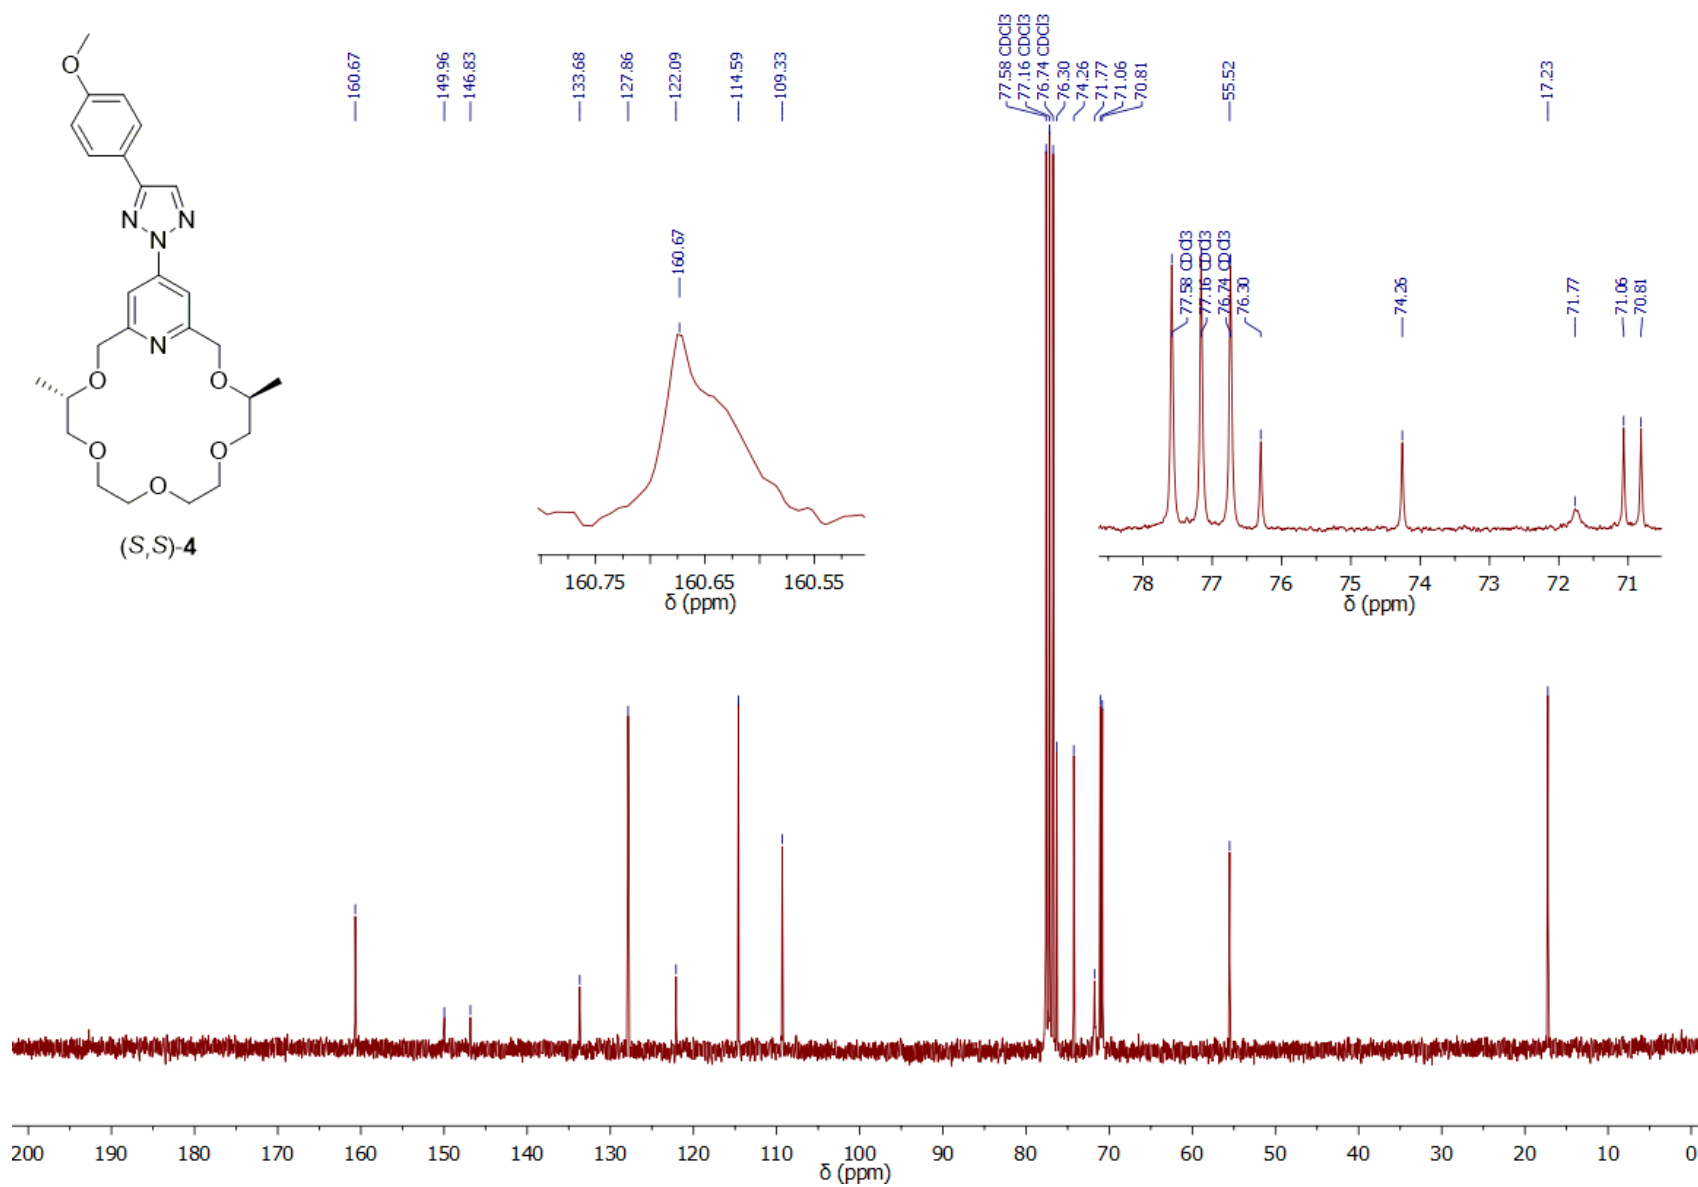

Figure S8. <sup>13</sup>C NMR spectrum of (S,S)-4 (CDCl<sub>3</sub>, 125 MHz)

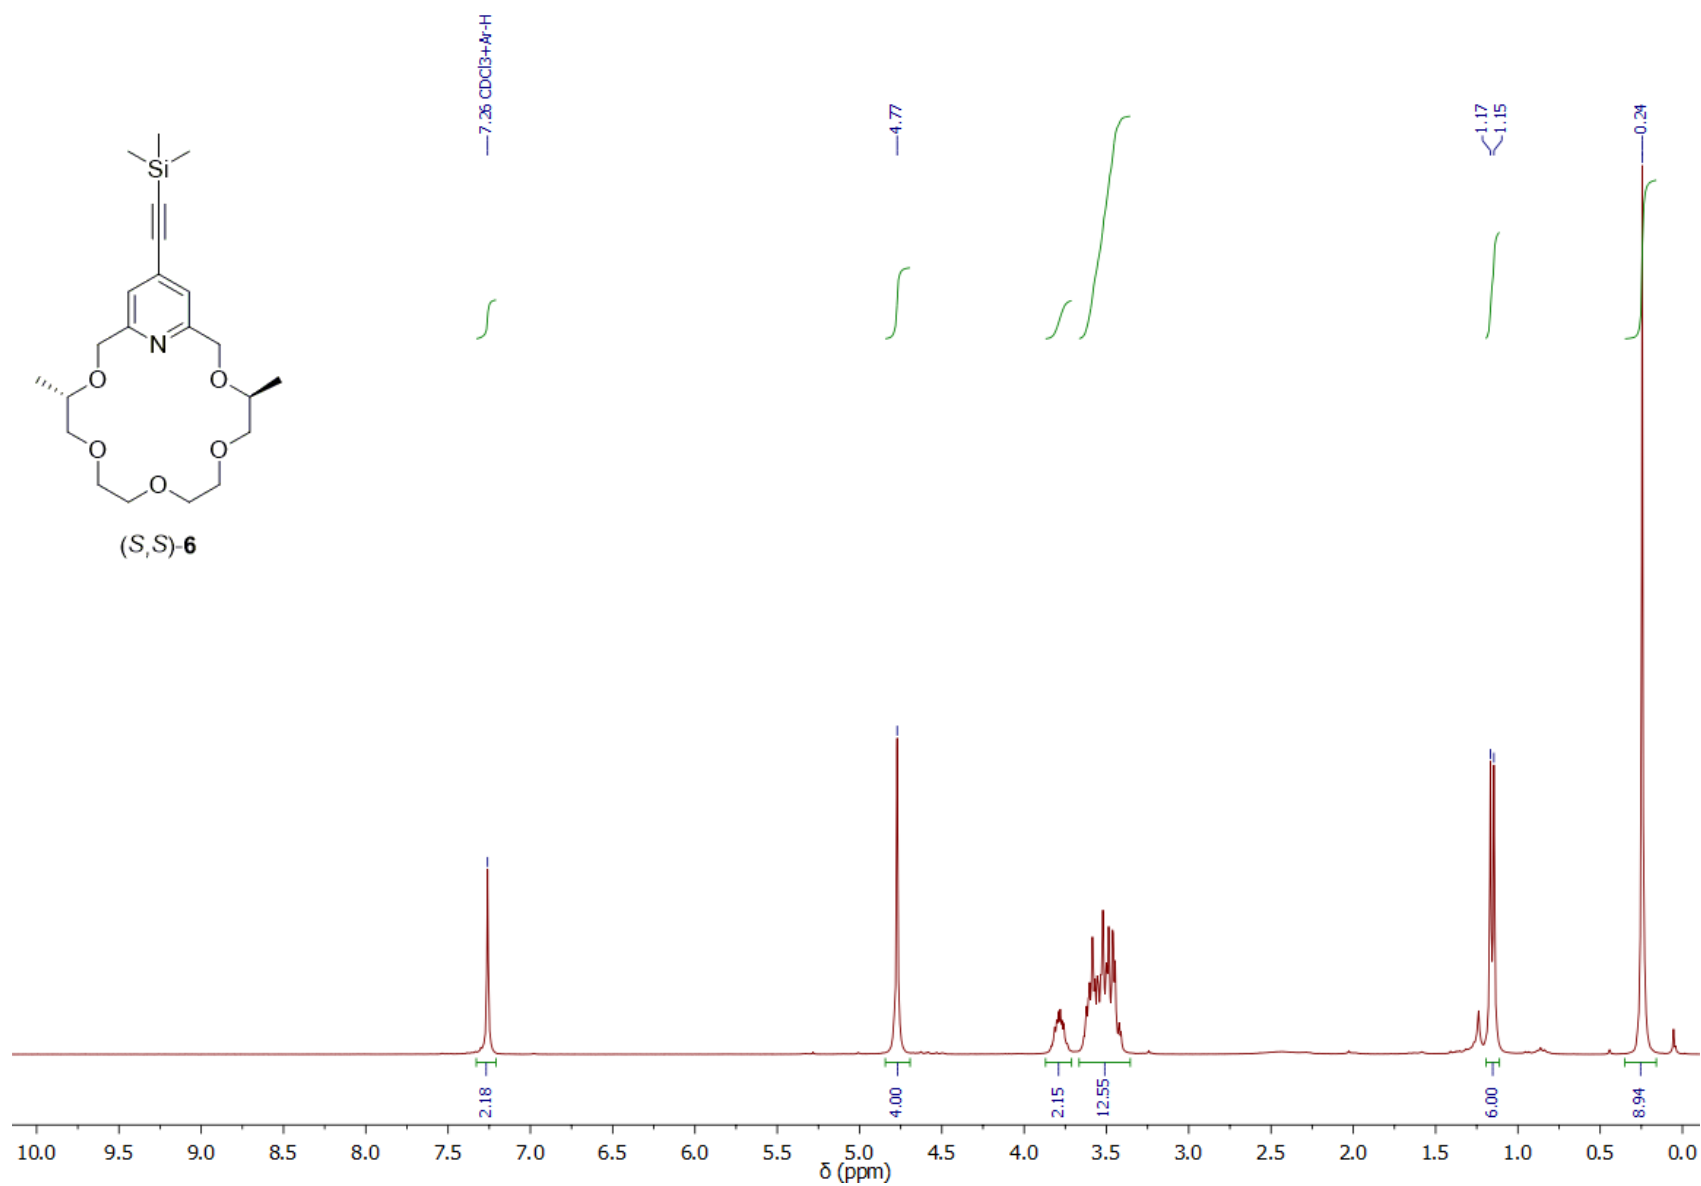

Figure S9.  $^1\text{H}$  NMR spectrum of (S,S)-6 ( $\text{CDCl}_3$ , 300 MHz)

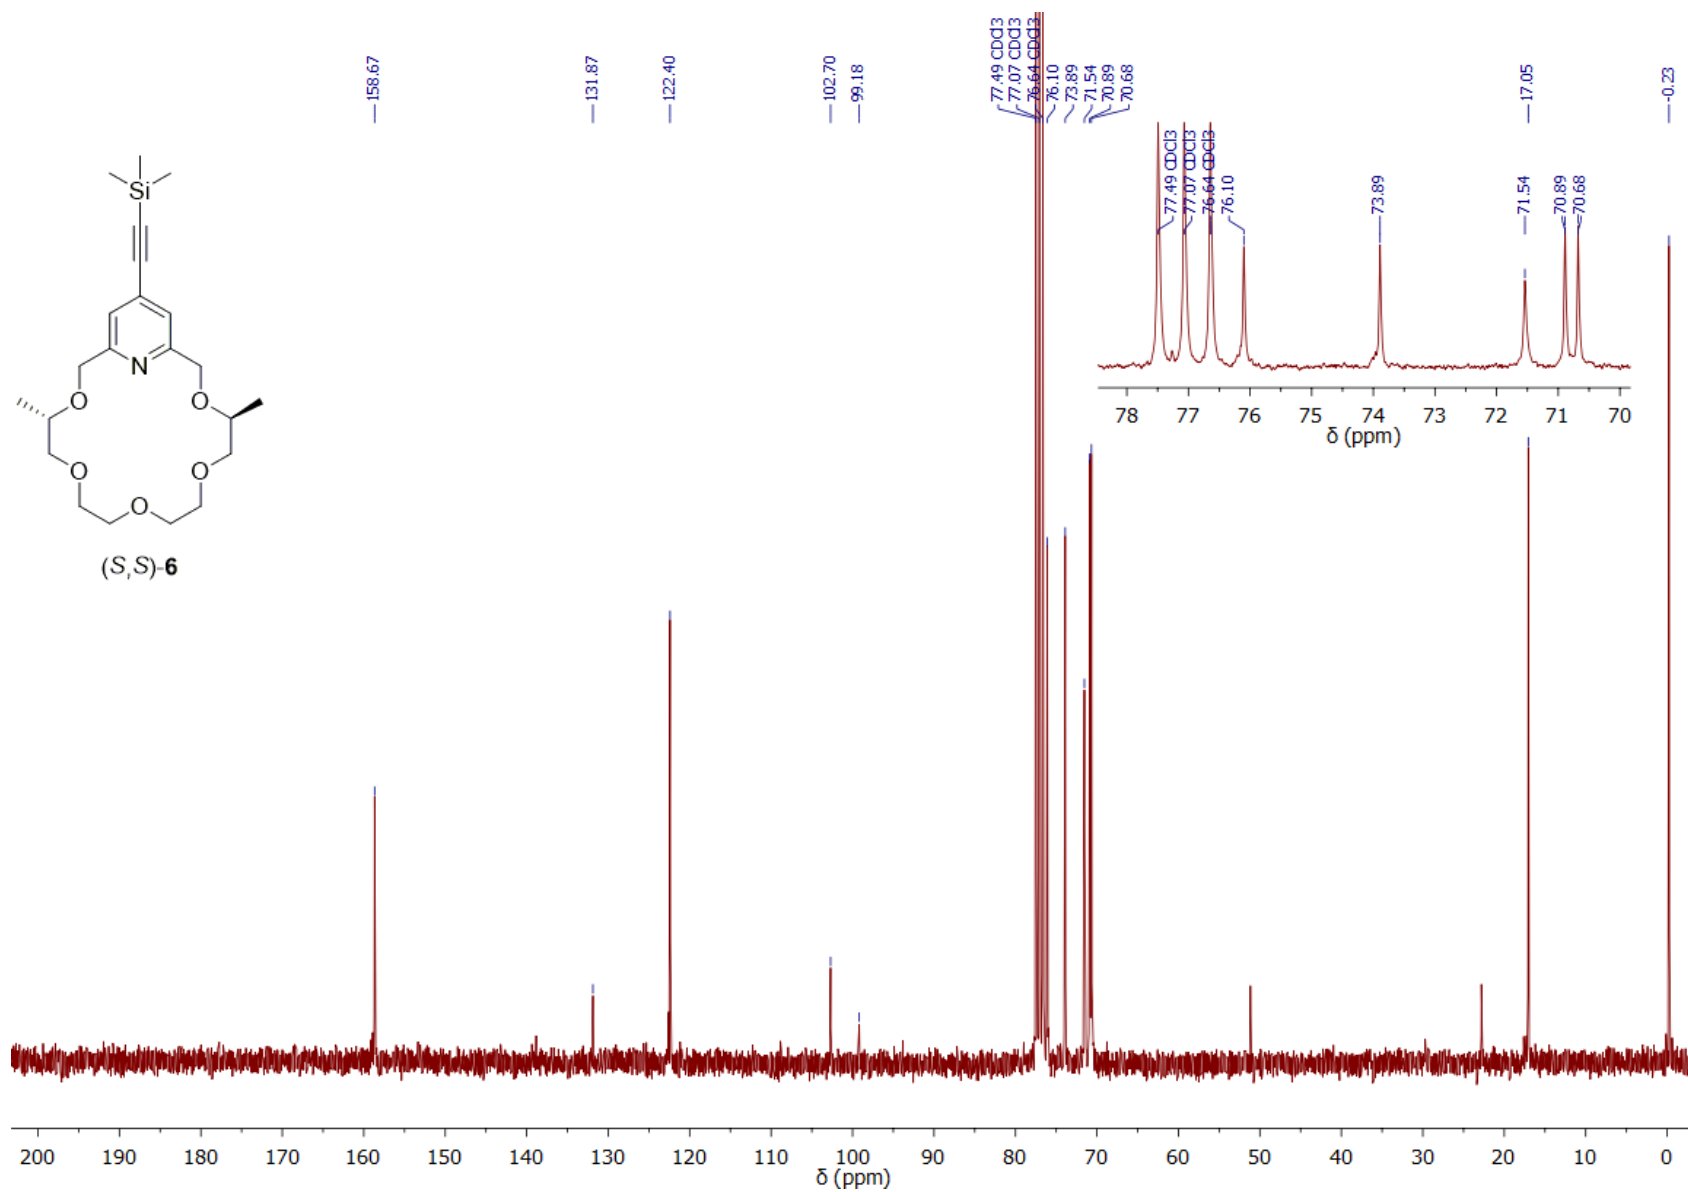

Figure S10.  $^{13}\text{C}$  NMR spectrum of  $(S,S)$ -6 ( $\text{CDCl}_3$ , 75.5 MHz)

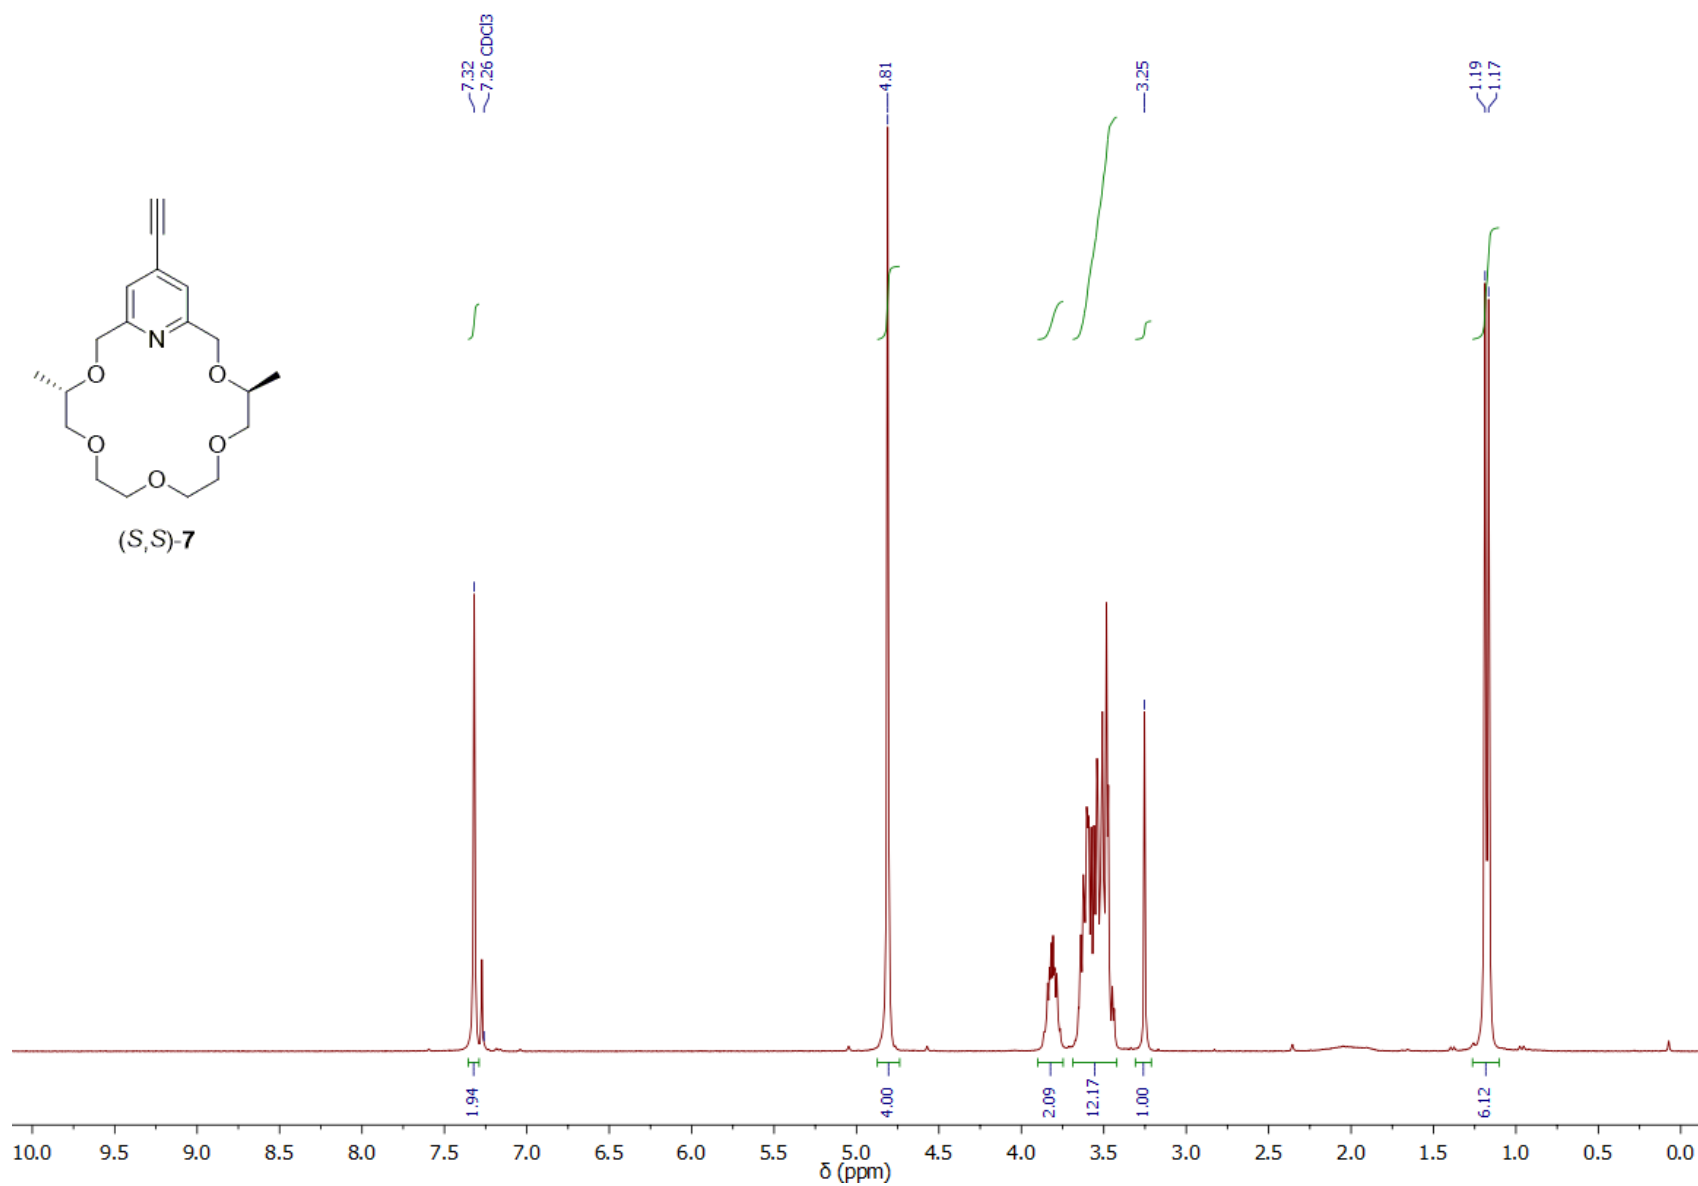

Figure S11. <sup>1</sup>H NMR spectrum of (S,S)-7 (CDCl<sub>3</sub>, 500 MHz)

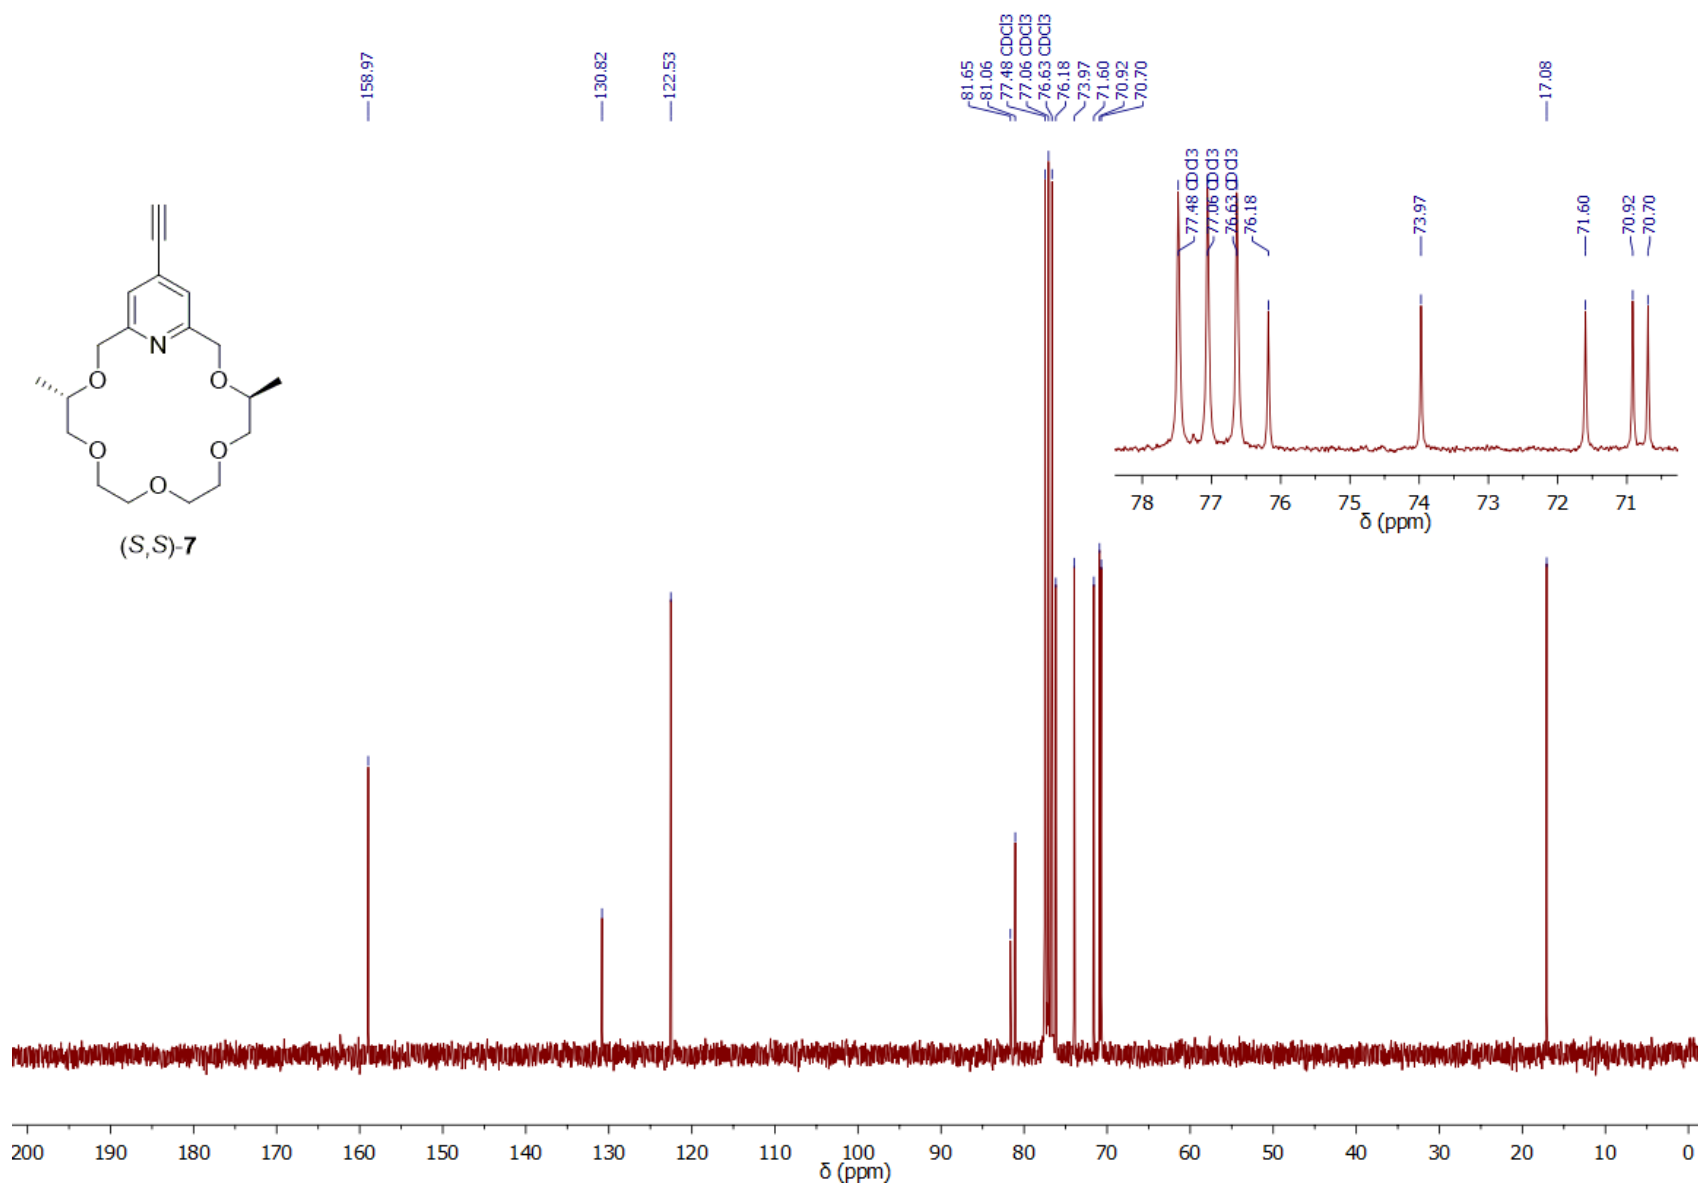

Figure S12. <sup>13</sup>C NMR spectrum of (S,S)-7 (CDCl<sub>3</sub>, 75.5 MHz)

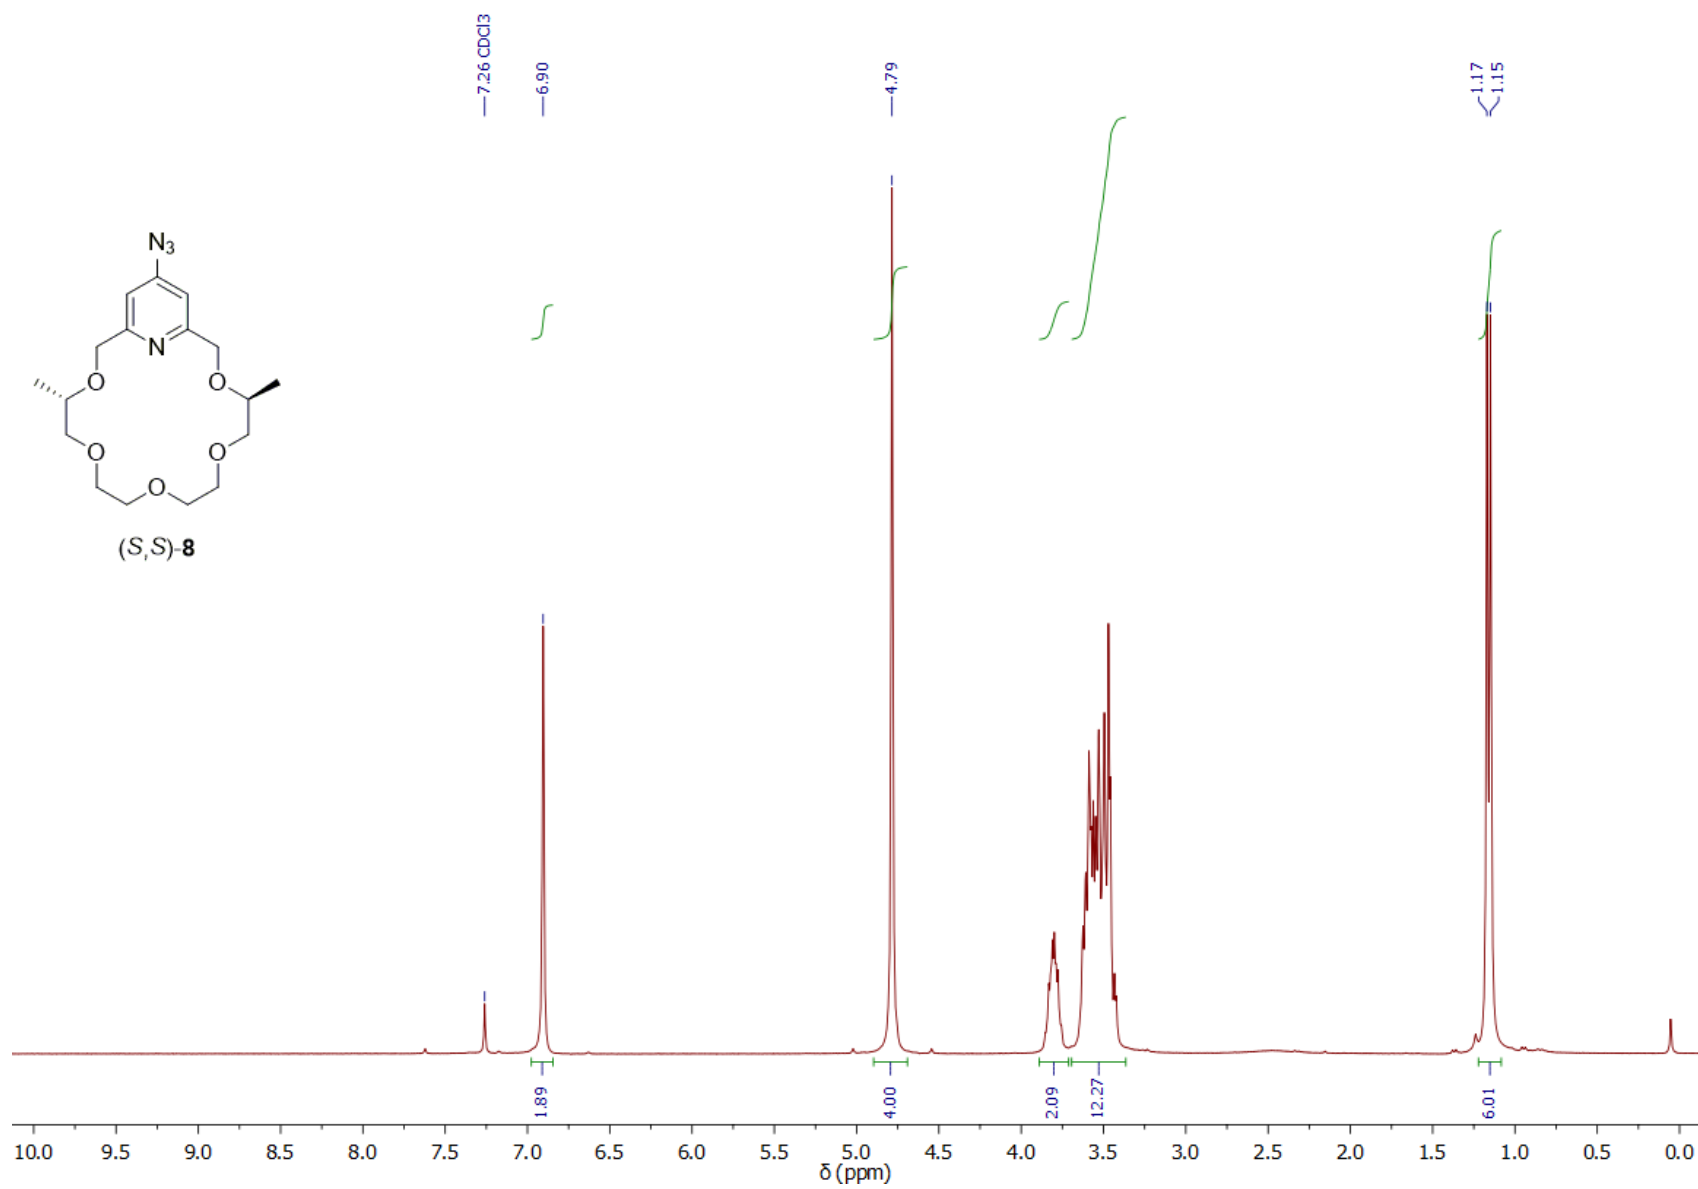

Figure S13. <sup>1</sup>H NMR spectrum of (S,S)-8 (CDCl<sub>3</sub>, 300 MHz)

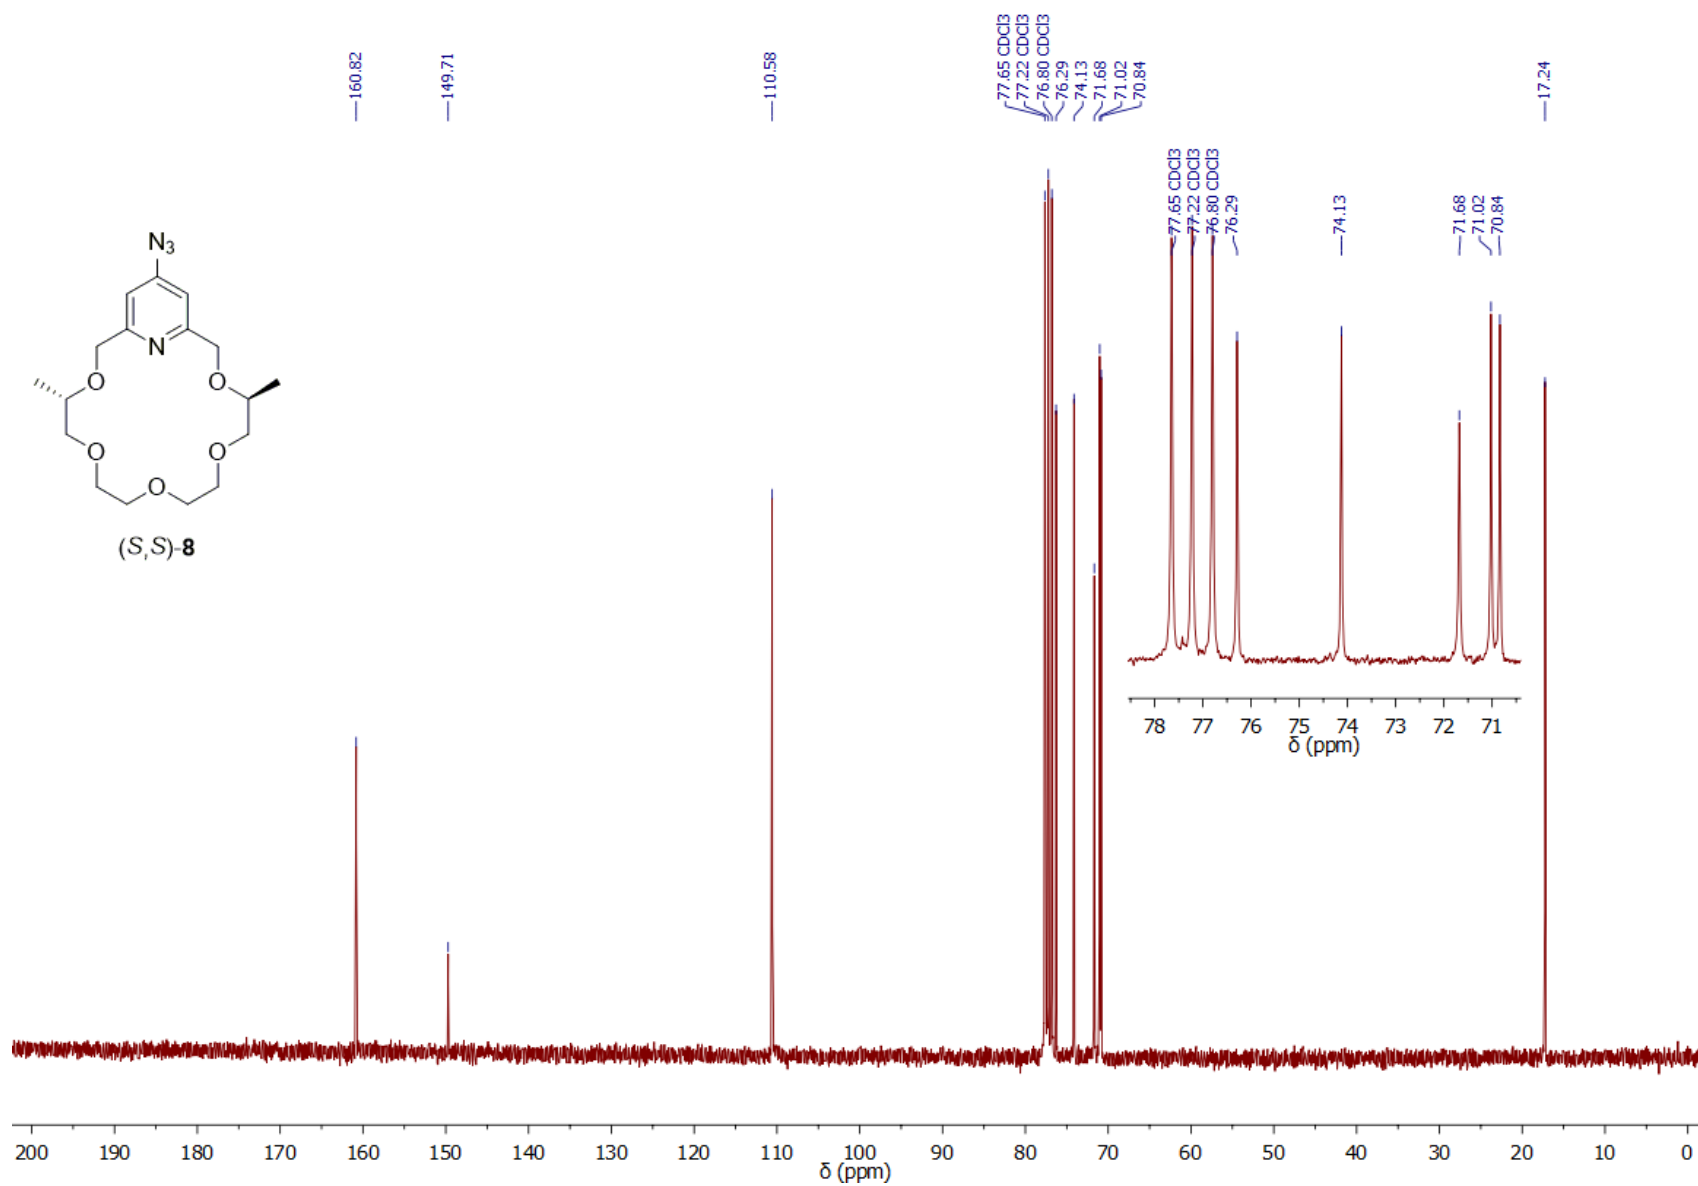

Figure S14. <sup>13</sup>C NMR spectrum of (S,S)-8 (CDCl<sub>3</sub>, 75.5 MHz)



## Evaluation of 2D NMR spectra of (S,S)-1–(S,S)-3

2D ROESY and HMBC spectra were recorded for further support of structures (S,S)-1–(S,S)-3. The ROESY spectrum of ligand (S,S)-2 showed a cross-peak between the triazole proton (8.25 ppm) and pyridine proton (7.71 ppm). Similarly, the triazole proton (8.82 ppm) and pyridine proton (7.77 ppm) of ligand (S,S)-3 gave a ROE signal. These interactions could not be detected for the corresponding 1,5-isomers.

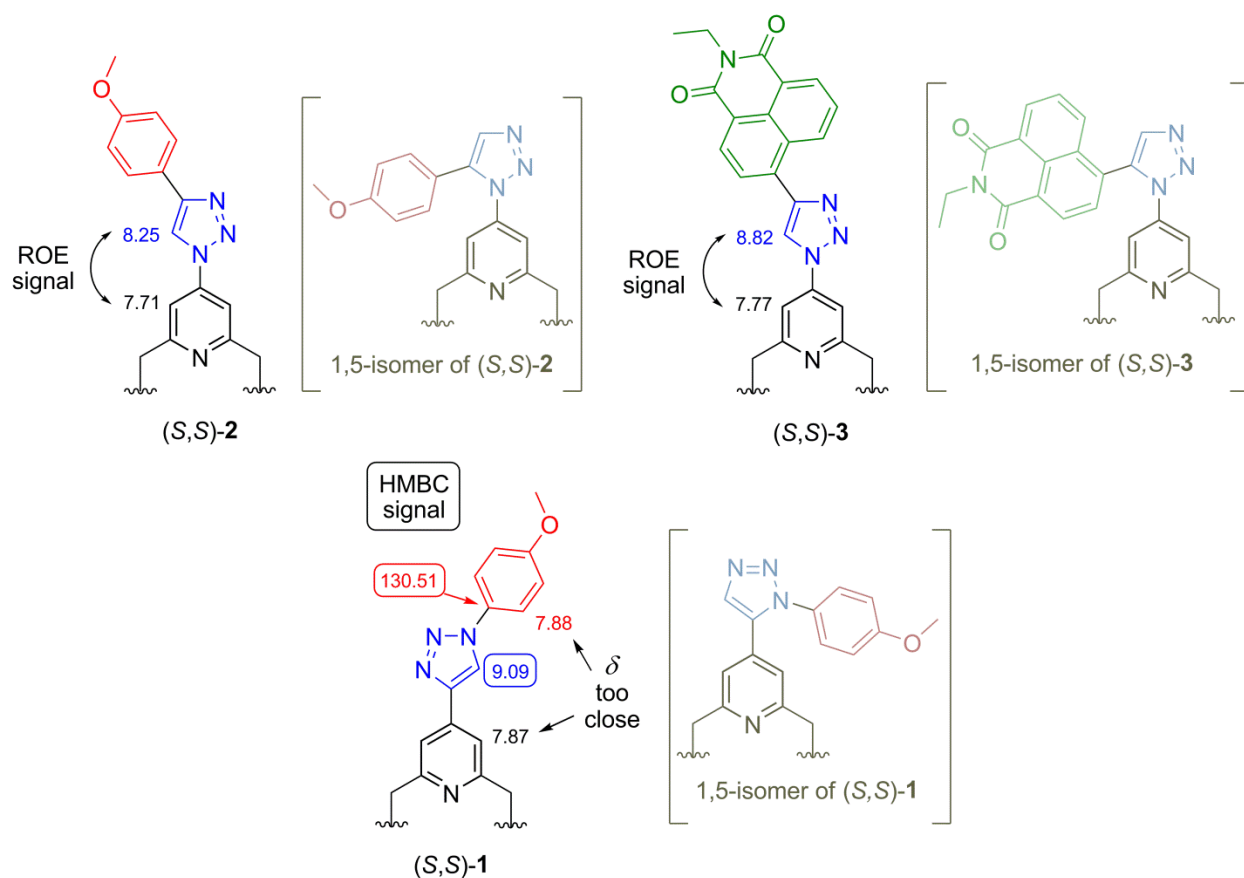

**Figure S15.** Parts of the structures of sensor molecules (S,S)-1–(S,S)-3 with proton and carbon signal values (ppm) used for verifying the structures by 2D NMR techniques

In the case of ligand (S,S)-1, a ROE signal between the triazole proton (9.09 ppm) and phenyl proton (7.88 ppm) as well as the absence of a cross-peak between the pyridine proton (7.87 ppm) and phenyl proton (7.88 ppm) would support structure (S,S)-1 and exclude its 1,5-isomer, but due to the very similar chemical shifts (7.87 and 7.88 ppm), these interactions could not be evaluated. Therefore, a HMBC spectrum was recorded. A weak HMBC signal between

the triazole proton (9.09 ppm) and phenyl carbon (131.34 ppm) confirmed structure (*S,S*)-**1**, because this correlation would not be expected for its 1,5-isomer through a four-bond distance. Furthermore, the predicted chemical shifts (by ACD/Spectrus software) for the triazole carbons of (*S,S*)-**1** are 121.96 ppm (C5) and 146.70 ppm (C4), in contrast to 134.28 ppm (C5) and 141.32 ppm (C4) for its 1,5-isomer. Thus, the corresponding measured values of 121.41 ppm (C5) and 146.63 ppm (C4) also suggest structure (*S,S*)-**1**.
